# Supplementary material
Source: PubMed Central journal article supplement (PMC3880139)
Supplement: NIHMS521706-supplement-supplement_1.pdf [file NIHMS521706-supplement-supplement_1.pdf]

## APPENDIX E1.

**Table E1.** Trauma registry characteristics and criteria by site.

| Characteristic/Criteria                             | Site                   |                        |                                                                   |                        |                        |                                                                  |                        |                        |
|-----------------------------------------------------|------------------------|------------------------|-------------------------------------------------------------------|------------------------|------------------------|------------------------------------------------------------------|------------------------|------------------------|
|                                                     | 1                      | 2                      | 3                                                                 | 4                      | 5                      | 6                                                                | 7                      | 8                      |
| <b>Trauma registry characteristics</b>              |                        |                        |                                                                   |                        |                        |                                                                  |                        |                        |
| Traumatic intracranial hemorrhage/y                 | 200                    | 678                    | 279                                                               | 131                    | 164                    | 164                                                              | 194                    | 354                    |
| <b>Trauma registry inclusion/exclusion criteria</b> |                        |                        |                                                                   |                        |                        |                                                                  |                        |                        |
| ICD-9 criteria*                                     | Yes                    | Yes                    | Yes                                                               | Yes                    | Yes                    | Yes                                                              | Yes                    | Yes                    |
| Transfers in/out of hospital included               | Yes                    | Yes                    | Yes                                                               | Yes                    | Yes                    | Yes                                                              | Yes                    | Yes                    |
| Discharged from ED included                         | Yes                    | Yes                    | Yes, if transfer in or out of hospital or >12-h ED length of stay | Yes                    | Yes                    | Yes                                                              | Yes                    | Yes                    |
| Additional inclusion criteria                       | Trauma team evaluation | Trauma team evaluation | Trauma team evaluation                                            | Trauma team evaluation | Trauma team evaluation | Trauma team evaluation                                           | Trauma team evaluation | Trauma team evaluation |
| Exclusion criteria                                  | None                   | Isolated hip fractures | Isolated hanging, drowning, or poisoning without ICD-9 criteria*  | None                   | None                   | Isolated hanging, drowning, or poisoning without ICD-9 criteria* | None                   | Isolated hip fractures |

\*Patients meet ICD-9 criteria if at least 1 of their codes is from 800 to 959.9 (excluding late effects of injury [905 to 909.9] and foreign bodies [930 to 939.9]).

**Table E2.** Analysis of interrater reliability between registry and manual reabstraction.

| Variable                                      | $\kappa$ | Agreement, % |
|-----------------------------------------------|----------|--------------|
| Age                                           | 0.8      | 83           |
| ED disposition                                | 0.8      | 91           |
| Initial ED GCS score                          | 0.8      | 84           |
| Mortality                                     | 1.0      | 100          |
| Presence of critical care intervention        | 0.6      | 78           |
| Presence of traumatic intracranial hemorrhage | 1.0      | 100          |

**Table E3.** Missing variables.

| Variable                                                | Missing, n | Missing, % |
|---------------------------------------------------------|------------|------------|
| <b>A, GCS score of 15 and ISS less than 16, n=1,429</b> |            |            |
| Site                                                    | 0          | 0          |
| Age                                                     | 0          | 0          |
| Sex                                                     | 0          | 0          |
| Initial ED systolic blood pressure                      | 5          | 0.35       |
| ALS, head                                               | 212        | 10         |
| Mortality                                               | 0          | 0          |
| Procedure code                                          | 0          | 0          |
| ED disposition                                          | 17         | 1.2        |
| Hospital disposition                                    | 5          | 0.35       |
| Hospital length of stay                                 | 1          | 0.07       |
| <b>B, Entire cohort, n=11,240</b>                       |            |            |
| Site                                                    | 0          | 0          |
| Age                                                     | 0          | 0          |
| Sex                                                     | 7          | 0.06       |
| Initial ED systolic blood pressure                      | 186        | 1.7        |
| Initial ED GCS score                                    | 671        | 6.0        |
| ALS, head                                               | 1,702      | 15         |
| ISS                                                     | 105        | 0.93       |
| Mortality                                               | 11         | 0.1        |
| Procedure code                                          | 0          | 0.0        |
| ED disposition                                          | 75         | 0.67       |
| Hospital disposition                                    | 69         | 0.61       |
| Hospital length of stay                                 | 15         | 0.13       |

**Table E4. A,** Comparison of patient characteristics between patients with missing initial ED GCS score or ISS and patients included in analysis.\*

| Variable                                     | Missing,<br>n=771 | Included in Analysis,<br>n=1,412 |
|----------------------------------------------|-------------------|----------------------------------|
| Age, mean (SD), y                            | 51 (21)           | 48 (20)                          |
| Men, % (95% CI)                              | 68 (65–72)        | 67 (65–70)                       |
| Initial ED SBP, mean (SD)                    | 138 (34)          | 140 (24)                         |
| Initial ED GCS score (IQR)                   | 14 (13, 15)       | 15 (15, 15)                      |
| Initial ED GCS score of 15, % (95% CI)       | 49 (39–59)        | 100                              |
| ISS, median (IQR)                            | 21 (17, 27)       | 10 (9, 11)                       |
| ISS 16 or greater, % (95% CI)                | 81 (78–84)        | 0                                |
| AIS, head, median (IQR)                      | 4 (3, 5)          | 3 (3, 3)                         |
| Mortality, % (95% CI)                        | 16 (14–19)        | 0.21 (0.04–0.62)                 |
| ED disposition, home, % (95% CI)             | 0.44 (0.09–1.3)   | 1.8 (1.2–2.6)                    |
| ED disposition, observation unit, % (95% CI) | 0.44 (0.09–1.3)   | 4.0 (3.0–5.1)                    |
| ED disposition, floor, % (95% CI)            | 16 (13–19)        | 31 (29–34)                       |
| ED disposition, ICU, % (95% CI)              | 83 (80–86)        | 63 (60–65)                       |

\*Initial ED GCS score 15 and ISS less than 16.

**Table E4. B,** Distribution of patients with missing ED disposition (n=17).\*

| Variable                                                           | Site |     |     |    |     |     |    |     |
|--------------------------------------------------------------------|------|-----|-----|----|-----|-----|----|-----|
|                                                                    | 1    | 2   | 3   | 4  | 5   | 6   | 7  | 8   |
| Patients, n                                                        | 0    | 1   | 11  | 0  | 0   | 1   | 0  | 4   |
| Patients included in analysis, n*                                  | 155  | 312 | 264 | 45 | 198 | 69  | 32 | 337 |
| Proportion of missing patients to patients included in analysis, % | 0    | 0.3 | 4.2 | 0  | 0   | 1.4 | 0  | 1.2 |

\*Initial ED GCS score of 15 and ISS less than 16.

**Table E4. C,** Comparison of patient characteristics between patients with Abbreviated Injury Score of 2, 3 or more, or missing.\*

| Variable                                     | AIS Score 2,<br>n=173  | AIS Score 3 or<br>More,<br>n=1,018 | AIS Score Missing,<br>n=221 |
|----------------------------------------------|------------------------|------------------------------------|-----------------------------|
| Age, mean (SD), y                            | 49 (20)                | 48 (20)                            | 46 (20)                     |
| Men, % (95% CI)                              | 68 (60–75)             | 67 (64–70)                         | 69 (62–75)                  |
| Initial ED SBP, mean (SD)                    | 136 (25)               | 143 (25)                           | 135 (21)                    |
| Mortality, % (95% CI)                        | 0 (0–2.1) <sup>†</sup> | 0.10 (0–0.55)                      | 0.90 (0.11–3.2)             |
| ED disposition, home, % (95% CI)             | 2.3 (0.63–5.8)         | 1.9 (1.1–2.9)                      | 0.90 (0.11–3.2)             |
| ED disposition, observation unit, % (95% CI) | 9.2 (5.3–15)           | 2.6 (1.5–3.5)                      | 7.2 (4.2–11)                |
| ED disposition, floor, % (95% CI)            | 36 (29–44)             | 31 (29–34)                         | 27 (21–34)                  |
| ED disposition, ICU, % (95% CI)              | 52 (44–60)             | 64 (61–67)                         | 65 (58–71)                  |

\*Initial ED GCS 15 and ISS less than 16.

<sup>†</sup>One-sided, 97.5% CI.

**Table E4. D, ED disposition by site, No. (%).**

| Variable                                       | Site     |          |          |          |     |          |          |          |
|------------------------------------------------|----------|----------|----------|----------|-----|----------|----------|----------|
|                                                | 1        | 2        | 3        | 4        | 5   | 6        | 7        | 8        |
| Patients with minor tICH<br>(% of total tICH)* | 350 (32) | 817 (23) | 389 (25) | 181 (25) | n/a | 152 (37) | 66 (6.2) | 622 (32) |
| Discharged home                                | 1 (0.27) | 24 (2.9) | 2 (0.51) | 1 (0.55) | n/a | 6 (3.9)  | 0        | 2 (0.32) |
| Admitted to observation unit                   | 0        | 0        | 37 (9.5) | 5 (2.8)  | n/a | 14 (9.2) | 0        | 0        |
| Admitted to the ward                           | 93 (27)  | 169 (21) | 100 (26) | 4 (2.2)  | n/a | 29 (19)  | 1 (1.5)  | 274 (44) |
| Admitted to the ICU                            | 256 (73) | 624 (76) | 250 (64) | 171 (94) | n/a | 103 (68) | 65 (98)  | 346 (56) |

\*Addition of 2 groups: (1) GCS score of 15 and ISS less than 16; and (2) GCS score of 15, ISS less than 25, and AIS, head of 4.

**Table E4. E, ED disposition by site, No. (%).**

| Variable                                      | Site     |            |          |          |          |          |          |            |
|-----------------------------------------------|----------|------------|----------|----------|----------|----------|----------|------------|
|                                               | 1        | 2          | 3        | 4        | 5        | 6        | 7        | 8          |
| Patients with mild tICH<br>(% of total tICH)* | 770 (72) | 2,040 (63) | 758 (22) | 399 (64) | 582 (62) | 300 (76) | 546 (61) | 1,045 (65) |
| Discharged home                               | 1 (0.13) | 32 (1.6)   | 2 (0.26) | 5 (1.3)  | 0        | 6 (2.0)  | 0        | 2 (0.19)   |
| Admitted to observation unit                  | 0        | 0          | 52 (6.9) | 9 (2.3)  | 24 (4.1) | 17 (5.7) | 0        | 0          |
| Admitted to the ward                          | 166 (22) | 468 (23)   | 148 (20) | 10 (2.5) | 136 (23) | 46 (15)  | 7 (1.3)  | 340 (33)   |
| Admitted to the ICU                           | 603 (78) | 1,540 (75) | 556 (73) | 375 (94) | 422 (73) | 231 (77) | 539 (99) | 703 (67)   |

\*GCS score of 13 to 15.

**Table E5. Patient characteristics by site (all patients with tICH, n=11,240).**

| Variable                              | Site        |             |             |             |             |             |             |             |
|---------------------------------------|-------------|-------------|-------------|-------------|-------------|-------------|-------------|-------------|
|                                       | 1           | 2           | 3           | 4           | 5           | 6           | 7           | 8           |
| Patients, n                           | 1,101       | 3,562       | 1,534       | 722         | 900         | 410         | 1,066       | 1,945       |
| Age, mean (SD), y                     | 49 (22)     | 55 (22)     | 46 (19)     | 49 (22)     | 48 (22)     | 61 (22)     | 51 (22)     | 43 (18)     |
| Men, % (75% CI)                       | 69 (67–72)  | 64 (63–66)  | 75 (73–77)  | 65 (61–68)  | 69 (66–72)  | 66 (61–70)  | 71 (69–74)  | 745(73–77)  |
| Initial ED SBP, mean (SD)             | 131 (33)    | 144 (28)    | 126 (40)    | 149 (31)    | 132 (30)    | 141 (29)    | 141 (39)    | 146 (41)    |
| Initial ED GCS score, median<br>(IQR) | 14 (11, 15) | 15 (6, 15)  | 14 (3, 15)  | 15 (14, 15) | 14 (3, 15)  | 14 (13, 15) | 14 (9, 15)  | 14 (3, 15)  |
| Mild GCS score, % (95% CI)            | 72 (71–73)  | 64 (64–65)  | 58 (57–59)  | 84 (83–86)  | 65 (63–66)  | 76 (74–77)  | 62 (60–63)  | 59 (57–61)  |
| Moderate GCS score, % (95% CI)        | 6 (6–7)     | 6 (6–6)     | 6 (6–7)     | 5 (5–6)     | 5 (5–6)     | 7 (6–8)     | 15 (14–16)  | 4 (3–5)     |
| Severe GCS score, % (95% CI)          | 21 (20–22)  | 30 (29–30)  | 36 (35–37)  | 11 (10–12)  | 30 (29–31)  | 17 (16–19)  | 23 (22–24)  | 37 (35–40)  |
| GCS score 15, % (95% CI)              | 47 (46–48)  | 49 (48–50)  | 42 (41–43)  | 55 (53–56)  | 46 (45–48)  | 49 (47–51)  | 25 (23–26)  | 48 (46–50)  |
| AIS head, median (IQR)                | 4 (3, 4)    | 4 (4, 5)    | 4 (3, 5)    | 4 (4, 4)    | 3 (2, 4)    | 4 (3, 4)    | 3 (3, 4)    | 4 (3, 4)    |
| ISS, median (IQR)                     | 17 (14, 26) | 26 (17, 30) | 22 (16, 30) | 19 (17, 26) | 17 (10, 25) | 17 (14, 26) | 25 (17, 30) | 22 (16, 29) |
| Mortality, % (95% CI)                 | 11 (10–13)  | 13 (12–13)  | 15 (14–17)  | 14 (14–15)  | 14 (12–16)  | 14 (11–18)  | 21 (19–24)  | 16 (15–18)  |
